# Supplementary material for: Multi-level analysis of the interactions between REVOLUTA and MORE AXILLARY BRANCHES 2 in controlling plant development reveals parallel, independent and antagonistic functions
Source: Development. 2020 May 21;147(10):dev183681. doi: 10.1242/dev.183681 (PMC7325436; doi:10.1242/dev.183681)
Supplement: Supplementary information [file develop-147-183681-s1.pdf]

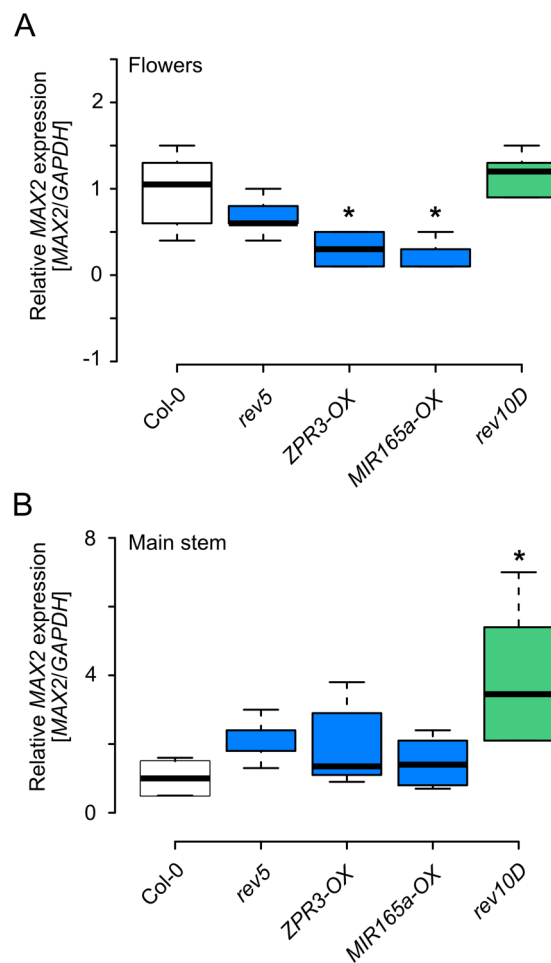

**Figure S1 – Analysis of MAX2 expression in flowers and stems of wild type and mutant plants.**

RT-qPCR analysis of *MAX2* expression in A, flowers and B, main stems of mature *Arabidopsis* plants. Expression of genes is relative to *GAPDH* which was used as internal reference gene. Plotted is the summary of two biological replicates. \* $P < 0.05$ , \*\* $P < 0.005$  \*\*\* $P < 0.0005$ , Student's t-test.

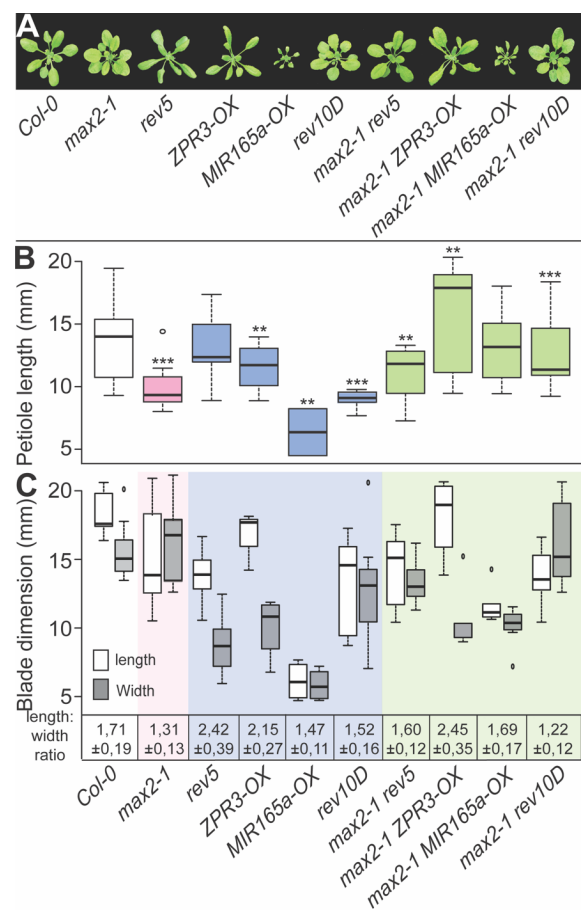

**Figure S2 – MAX2 and HD-ZIP IIIs regulate different leaf traits.**  
(A) Phenotypes of rosettes of representative 3-week-old plants grown under LD photoperiod (16 h light/8 h dark). (B) Quantification of the length of petioles of the 7th leaf of 3-week-old of Col-0 (wildtype, white), single mutant plants (pink, blue), and double mutant plants (green) grown under LD photoperiod. \*\*P<0.005, \*\*\*P<0.0005, Student's t-test. N=7-15. (C) Quantification of the length of the leaf blade (white) and width of the leaf blade (gray) of the 7th leaf of 3-week-old plants grown under LD photoperiod. Mean length:width ratio ±95% is shown below the x axis.

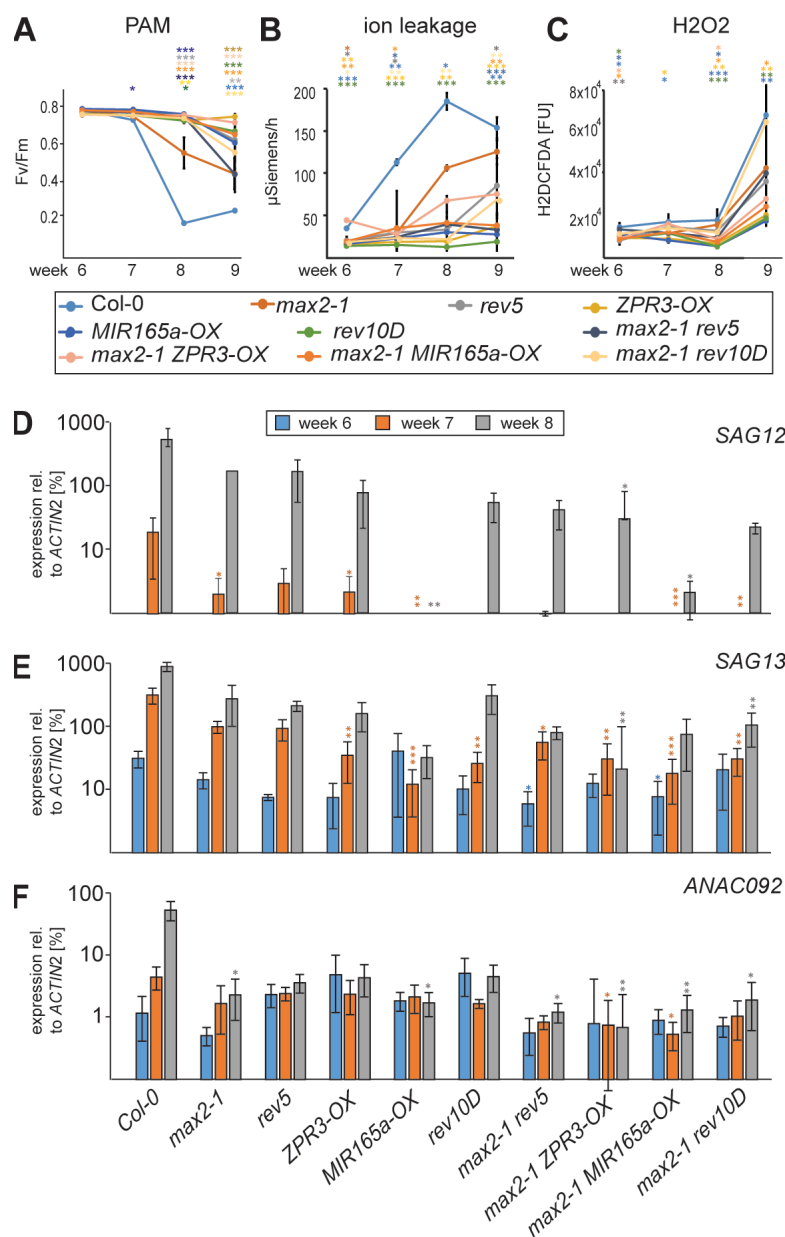

### Figure S3 - Senescence phenotype parameters

Different key processes like photosynthetic capacities, membrane degradation, redox status and genetic regulation were analyzed as parameters involved in senescence. **(A)** The efficiency of photosystem II (Fv/Fm) was measured using the pulse amplitude modulation (PAM) chlorophyll fluorometer. Therefore, leaves at position 5 were analyzed. **(B)** Ion leakage over time was measured in single detached leaves at position 4 using a conductivity meter. **(C)** The H2O2 content was measured using carboxy-H2DCFDA fluorescence assay in independent leaves at position 9. Data are means ( $\pm$ SE) of 6 biological replicates of each line which were harvested weekly, shown here for week 6, 7, 8 and 9. Genetic regulation of senescence-related genes was analyzed by qRT-PCR using primers of different key markers like SAG12 **(D)**, SAG13 **(E)**, ANAC092 **(F)** qRT-PCR was done with a pool of 6 plants using either leaves at position 6 or 7. Expression levels were shown relative to *ACTIN2*. Data are means ( $\pm$ SE)  $n=3$ . Kruskal-Wallis-test was performed for statistically significant differences of all values at each timepoint compared to Col-0 (\* $P \leq 0.05$ , \*\* $P \leq 0.01$ , \*\*\* $P \leq 0.001$ ).

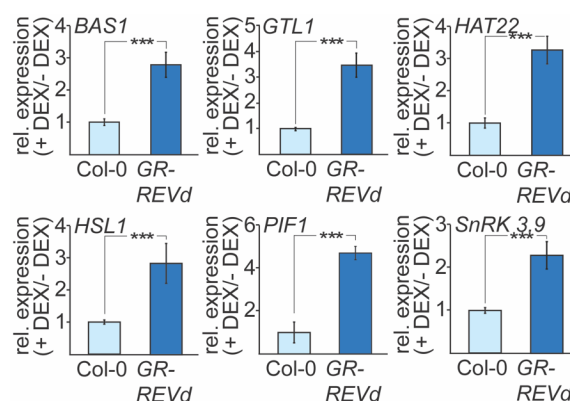

**Figure S4 – REV regulates the expression of potential direct target genes involved in shoot branching/growth control.**

Quantitative real-time PCR (RT-qPCR) experiments of putative REV target genes in 10-day-old Col-0 wild-type (light blue) and 35S::GR-REVd (dark blue) seedlings in response to 60 min DEX (25 $\mu$ M) induction in the presence of the protein biosynthesis inhibitor cycloheximide (CHX). Plotted is the relative induction (+DEX +CHX/-DEX +CHX) for both genotypes as average values of three biological replicates  $\pm$  SD. \*\*\*P<0.0005, Student's t-test.

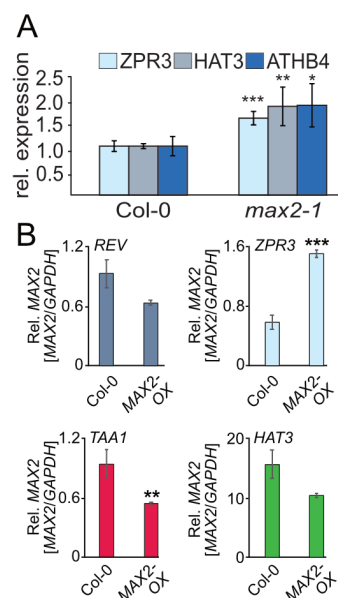

**Figure S5 – Analysis of REV target genes in *max2* mutant plants suggests an antagonistic role of MAX2 to REV function.**

**(A)** RT-qPCR analysis of REV direct downstream target genes (*ZPR3*, *HAT3*, and *ATHB4*) expression in 10-day-old seedlings of Col-0 and *max2-1*. Expression of genes is relative to *GAPDH* internal reference gene. Plotted is the summary of three biological replicates  $\pm$  SD. \* $P < 0.05$ , \*\* $P < 0.005$  \*\*\* $P < 0.0005$ , Student's t-test.

**(B)** RT-qPCR analysis of *REV*, *ZPR3*, *TAA1* and *HAT3* in wild type Col-0 and transgenic plants overexpressing *MAX2* (*MAX2-OX*, 35S::*FLAG-MAX2*). \*\* $P < 0.005$  \*\*\* $P < 0.0005$ , Student's t-test.
